# Supplementary material
Source: PubMed Central journal article supplement (PMC4594417)

Supplementary Figure 1: Primers used to verify properly targeted genes in the sugar *Gr64a* and *Gr5a* loci. For location, see Figure 1.

---

|     |                                      |
|-----|--------------------------------------|
| P1  | GATCACCTTGTACCTGTGTGCG               |
| P2  | GCTTGATGGCTTCCTGGAAAGATC             |
| P3  | CCAGAGGATTATGTTCTGCTC                |
| P4  | ACCATATATCCAGAGCTAACAC               |
| P6  | TTTTTCTAGACTATGAGTAATAGCTCTGATCGCAG  |
| P7  | AAGAATCGCTGCTGTTTCATAG               |
| P8  | GGTGAAGAACAACCTGAACCA                |
| P9  | TTTTGGTACCCACCATGCAGCAGTCGGGTCAAAAAG |
| P10 | GCTAGCCTTATGGCGGACACTGCAATCCTGG      |
| P11 | CGCATTTAACGTTGTTTCCGGTGC             |
| P12 | GCTAGCGTTTTTACGCCTGCTGTCTGCTG        |
| G4  | CTTGATTCCACTTCTGTCAGATGT             |
| LA  | GACCTTCAATATGCTGTTGCGC               |
| W   | TGACGCTACGTAACGCTACAAACGG            |

---

Supplementary Figure 2: Cellular responses of 5v associated sweet GRNs in control (*Gr64a<sup>GAL4/+</sup>*) and *Gr64a* mutant (*Gr64a<sup>GAL4/GAL4</sup>*) mutant flies.

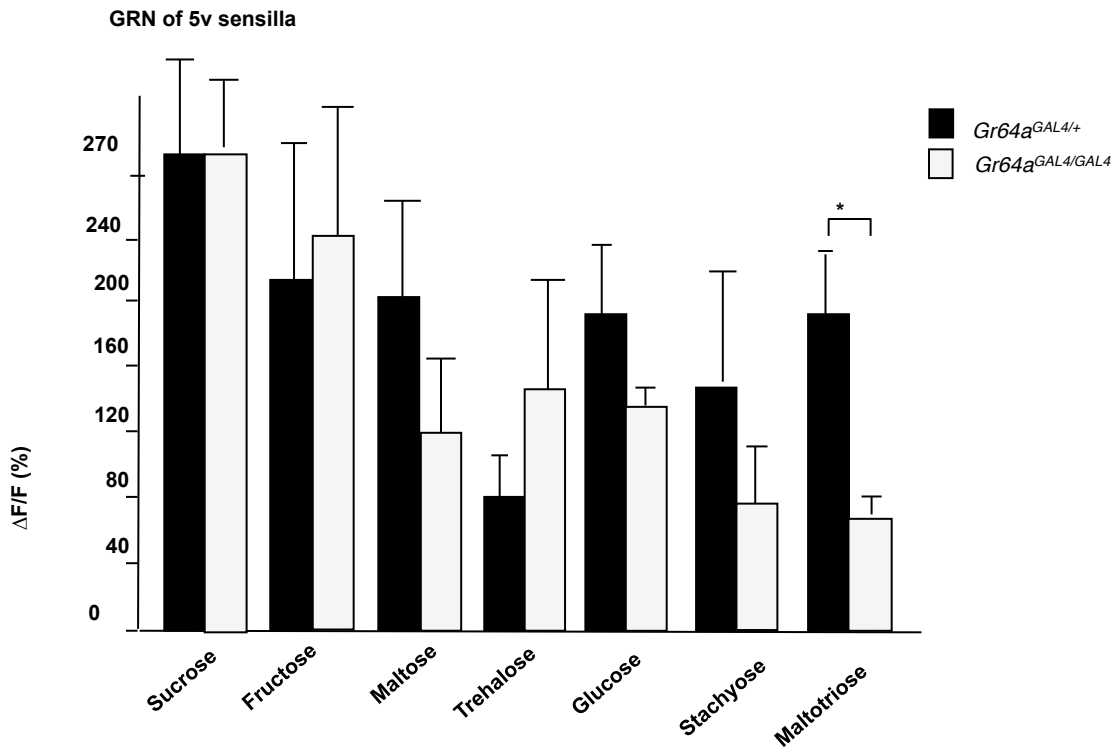

Supplement: kfly-08-04-1050569-s001.pdf [file kfly-08-04-1050569-s001.pdf]
